# Supplementary material
Source: PubMed Central journal article supplement (PMC3678566)
Supplement: Supp_Table1.pdf [file Supp_Table1.pdf]

SUPPLEMENTARY TABLE S1. SEQUENCES OF MORPHOLINOS AND PRIMERS USED

|                            |                                                 |
|----------------------------|-------------------------------------------------|
| Morpholinos                |                                                 |
| <i>ifngr1(crfb17)</i> -5'  | CGATGAGACACAGATCAATATCCGCAT                     |
| <i>ifngr1(crfb17)</i> -IE3 | ATCACGTTTCCTGGAACACAAATAA                       |
| PCR primers                |                                                 |
| <i>ifng1-1q</i> -F4        | CTTCAGACAACCAGCGCATA                            |
| <i>ifng1-1q</i> -B4        | CAGCATTTCCTCAAGCAACA                            |
| <i>ifng1-2q</i> -F4        | CTATGGGCGATCAAGGAAAA                            |
| <i>ifng1-2q</i> -B4        | CTTTAGCCTGCCGTCTCTTG                            |
| <i>crfb17q</i> -F1         | AAGTTCCTCTGCATTTCCA                             |
| <i>crfb17q</i> -B1         | TGGGGTCAGCTGGTTCTATC                            |
| <i>irf1q</i> -F1           | TGGAGGACATGAGCAGTGAG                            |
| <i>irf1q</i> -B1           | CTAAGATGGCTTCGCTGTCC                            |
| <i>ifng1-1ish</i> -F1      | GCATCACTTGGTTCACAGCA                            |
| <i>ifng1-1ish</i> -B1      | GAATTCATTAACCCTCACTAAAGGGACCCTTTGGATCTTCTCAGTGG |
| <i>ifng1-2ish</i> -F1      | ATGATTGCGCAACACATGAT                            |
| <i>ifng1-2ish</i> -B1      | GAATTCATTAACCCTCACTAAAGGGACTTTAGCCTGCCGTCTCTTG  |
| <i>ifng1-1-M</i> -F1       | AGTTTATTTAATTTAATTGTATCGT                       |
| <i>ifng1-1-M</i> -B1       | TACCTTCTCACAACAAAAAATCG                         |
| <i>ifng1-1-U</i> -F1       | ATAATTTAGTTTATTTAATTTAATTGTATT                  |
| <i>ifng1-1-U</i> -B1       | ACCTTCTCACAACAAAAAATCACT                        |
| <i>ifng1-2-M</i> -F1       | TAATTATAGTTTTTTTTAGTTGAAGGCGTTC                 |
| <i>ifng1-2-M</i> -B1       | CAAAAAAATACGTAATAAACCGAT                        |
| <i>ifng1-2-U</i> -F1       | TATAGTTTTTTTTAGTTGAAGGTGTTTGT                   |
| <i>ifng1-2-U</i> -B1       | CAAAAAAATACATAATAAACCAAT                        |
| <i>crfb17-ex2</i> -F2      | TCATCCTTCTCCGGCTAATTT                           |
| <i>crfb17-ex4</i> -B1      | TGCAGAGGGTTGATGAACTG                            |

The morpholino sequences for the *crfb17* antisense morpholino oligonucleotides are shown in the *top section*. Below are primers used for quantitative PCR (with 'q' in the name) and *in situ* hybridization ('ish'). The methylation-specific QPCR primers are noted for *ifng1-1* and *ifng1-2*, with the sequence directed against the methylated form ('M') and unmethylated ('U'). The *last two sequences* are the primers used to confirm knockdown of the *crfb17*-IE MO.
